# Supplementary material for: Review: Veratrum californicum Alkaloids
Source: MDPI journal article supplement (doi:10.3390/molecules26195934), 2021-09-30
Supplement: s1 [file s1]

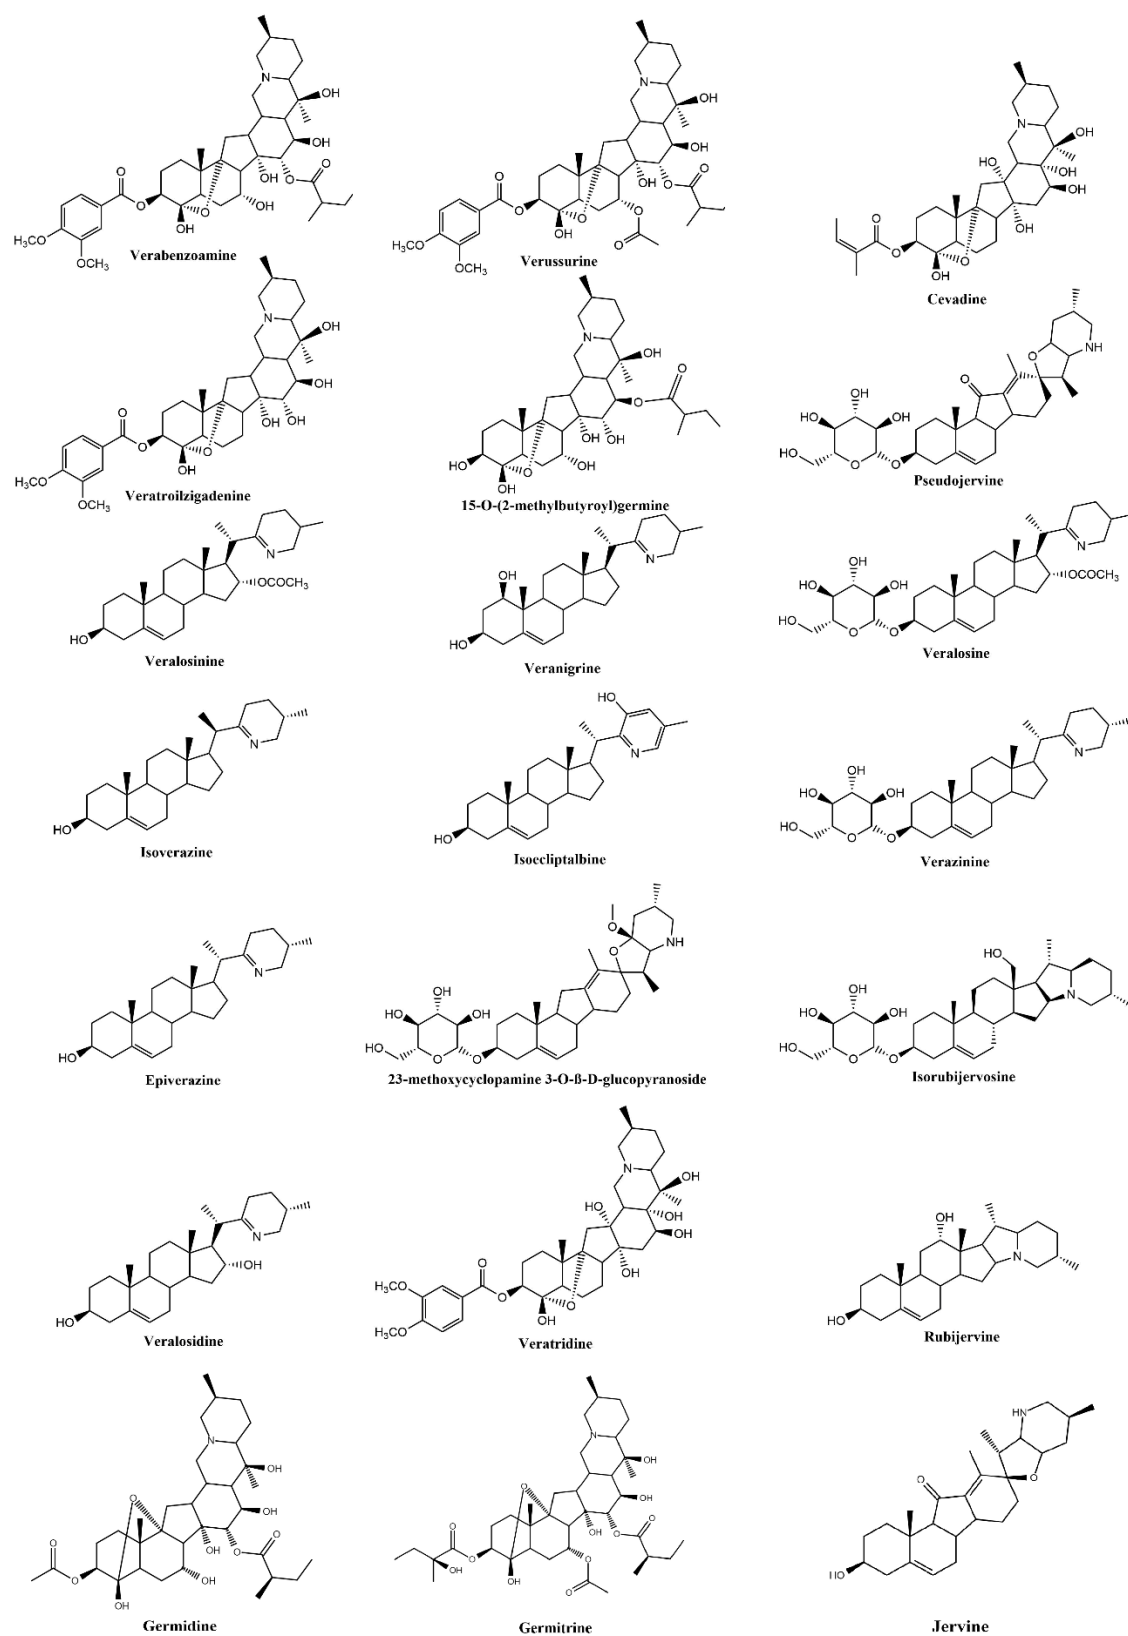

**Figure S1.** Structures of *Veratrum* spp. steroidal alkaloids, excluding those found in *V. californicum*
